# Supplementary material
Source: PubMed Central journal article supplement (PMC4496292)
Supplement: NIHMS693036-supplement-1.pdf [file NIHMS693036-supplement-1.pdf]

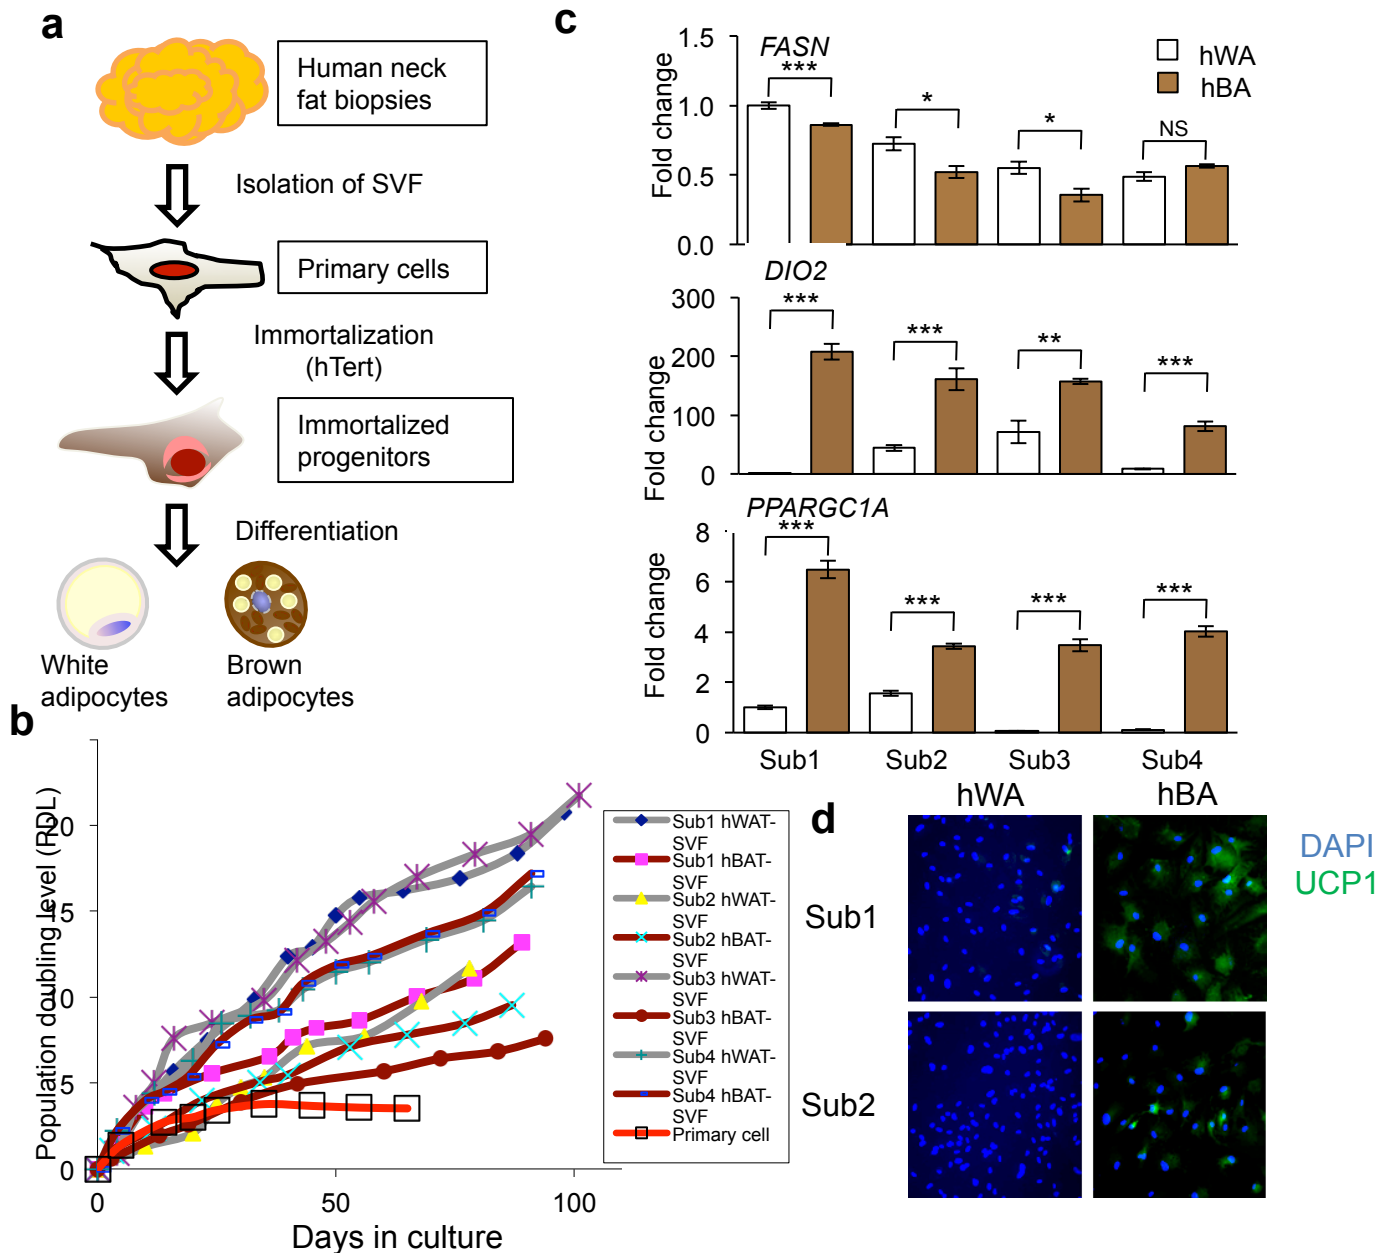

Supplementary Figure 1. Generation and characterization of immortalized human brown and white fat progenitors isolated from human neck fat depot. (a) Strategy of generating immortalized human brown and white fat progenitors from SVF isolated from BAT and WAT located in human neck fat depot. (b) Population doubling levels (PDL) of immortalized hWAT-SVF and hBAT-SVF from 4 subjects compared to primary SVF. Primary and immortalized human SVF were grown in DMEM/H supplemented with 10% FBS and 1% penicillin/streptomycin. Calculate the PDL with the following formula:  $\Delta\text{PDL} = \log(n_h/n_i)/\log 2$ , where  $n_i$  is the initial number of cells and  $n_h$  is the final number of cells at each passage. (c) Q-RT-PCR analysis for *FASN*, *DIO2* and *PPARGC1A* mRNA expression in differentiated human white fat (hWA) and brown fat (hBA) progenitors from 4 subjects. Data are presented as a fold change compared to Sub1 hWA (mean  $\pm$  s.e.m.,  $n=3$ ; two-tailed Student's *t*-test; N.S: not significant, \*  $P < 0.05$ , \*\*  $P < 0.01$ , \*\*\*  $P < 0.001$ ). (d) Immunofluorescence staining analysis of UCP1 (green) in differentiated hWA and hBA from Sub1 and Sub2. Nucleus is stained by DAPI (blue). The merge images of UCP1 (green) and DAPI (blue) are shown as indicated. The images are representative of three replicates. Scale bar, 100  $\mu\text{m}$ .

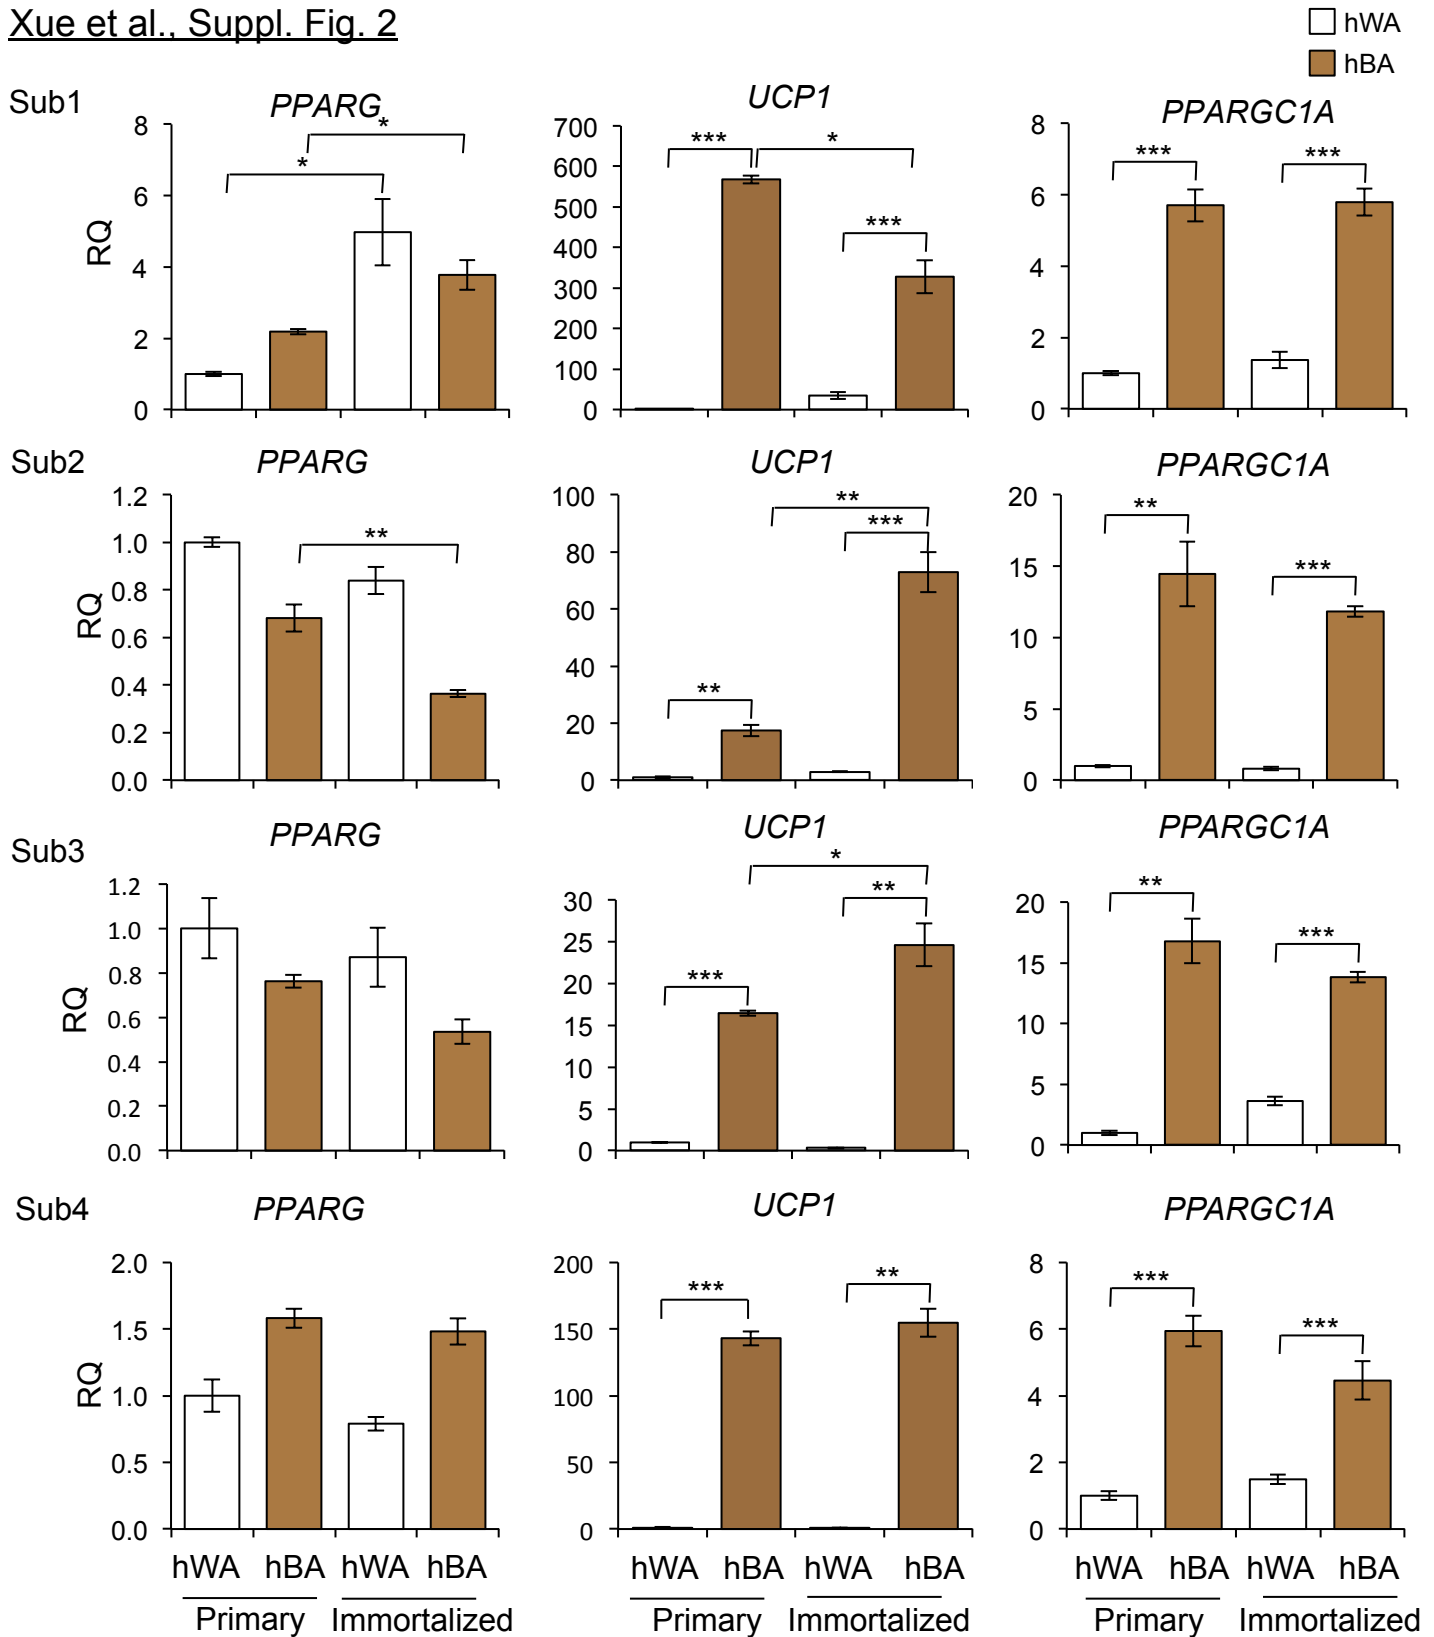

Supplementary Figure 2. Gene expression analysis of differentiated hWA and hBA derived from primary versus immortalized cells. RNA was isolated from differentiated primary and immortalized hWA and hBA from 4 subjects, and Q-RT-PCR analysis was performed for the adipocyte marker, *PPARG*, and brown-fat-specific markers, *UCP1* and *PPARGC1A*. Data are presented as a fold change compared to primary hWA in each subject (mean  $\pm$  s.e.m.,  $n=3$ ; two-tailed Student's *t*-test; \*  $P < 0.05$ , \*\*  $P < 0.01$ , \*\*\*  $P < 0.001$ ). A representative experiment from a total of three independent studies is shown.

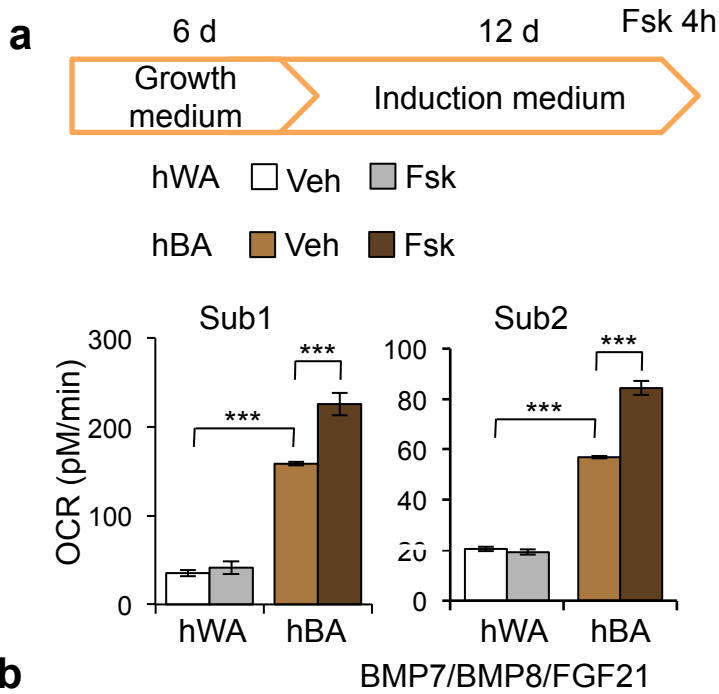

Supplementary Figure 3. Characterization of differentiated hWA and hBA treated with forskolin and browning inducers. (a) Total cellular respiration rate (OCR) was measured using the Seahorse extracellular flux analyzer in differentiated hWA and hBA from Sub1 and Sub2 that were treated for 4 h with 10  $\mu$ M forskolin (Fsk). The same number of cells was used in the assay. Data are presented as mean  $\pm$  s.e.m. ( $n=10$ ). (b) Q-RT-PCR analysis for *UCP1* and *DIO2* expression in differentiated hWA and hBA from Sub1 and Sub2 that were treated for 48 h with 3.3 nM BMP7, 3.3 nM BMP8 and 50 nM FGF21. Data are presented as a fold change compared to vehicle treatment of hWA in each subject (mean  $\pm$  s.e.m.,  $n=3$ ). A representative experiment from a total of three independent studies is shown. Two-tailed Student's *t*-test was used to determine *P* values (\*  $P < 0.05$ , \*\*  $P < 0.01$ , \*\*\*  $P < 0.001$ ).

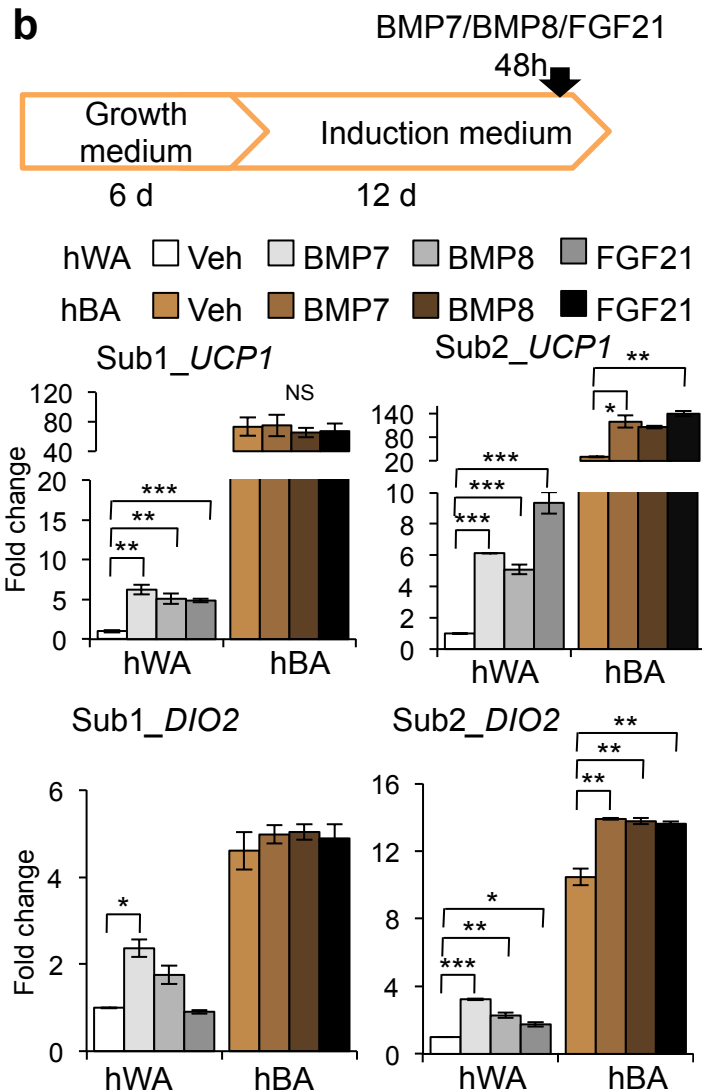

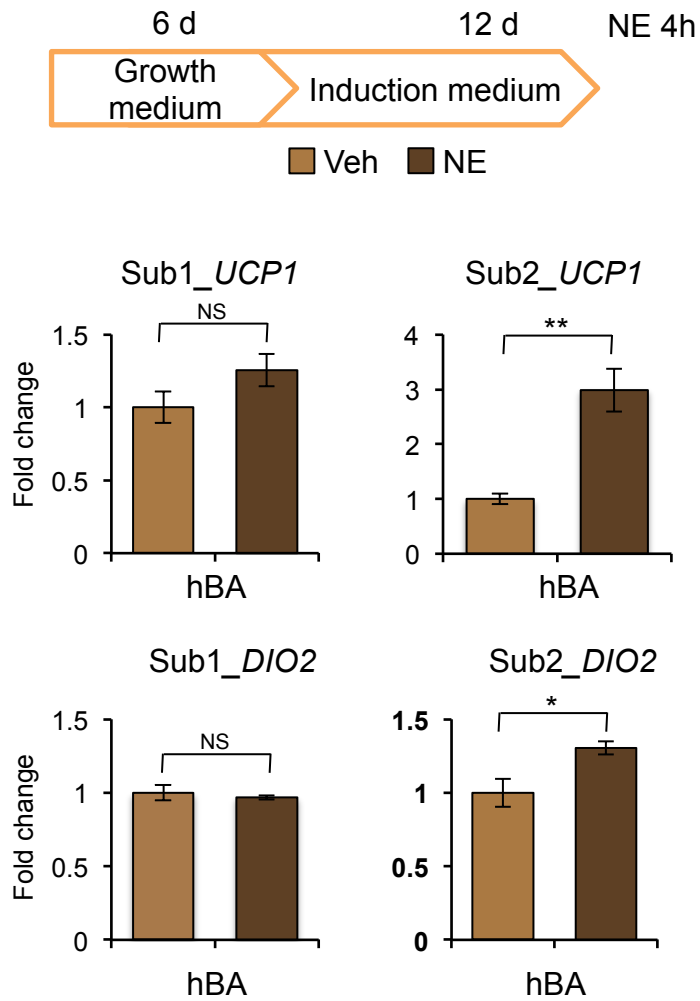

Supplementary Figure 4. Characterization of differentiated hBA treated with NE. Q-RT-PCR analysis for *UCP1* and *DIO2* expression in differentiated hBA from Sub1 and Sub2. Cells were treated for 4 h with 1  $\mu$ M norepinephrine (NE). Data are presented as fold changes relative to vehicle control (mean  $\pm$  s.e.m.,  $n=3$ ; two-tailed Student's *t*-test; \*  $P < 0.05$ , \*\*  $P < 0.01$ , \*\*\*  $P < 0.001$ ). A representative experiment from a total of three independent studies is shown.

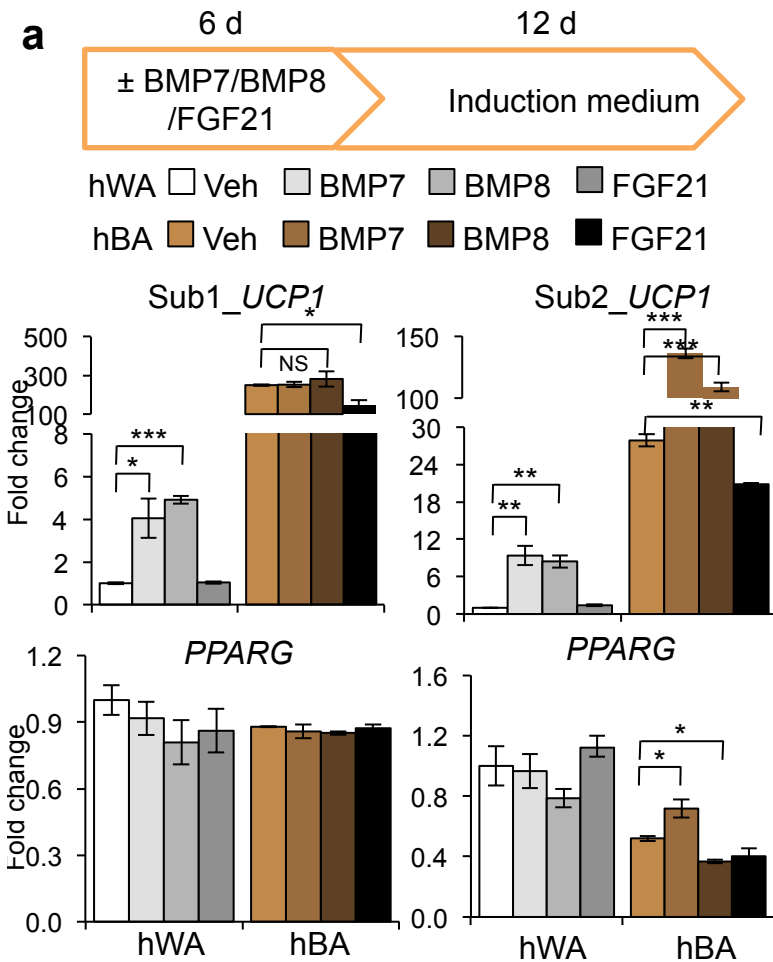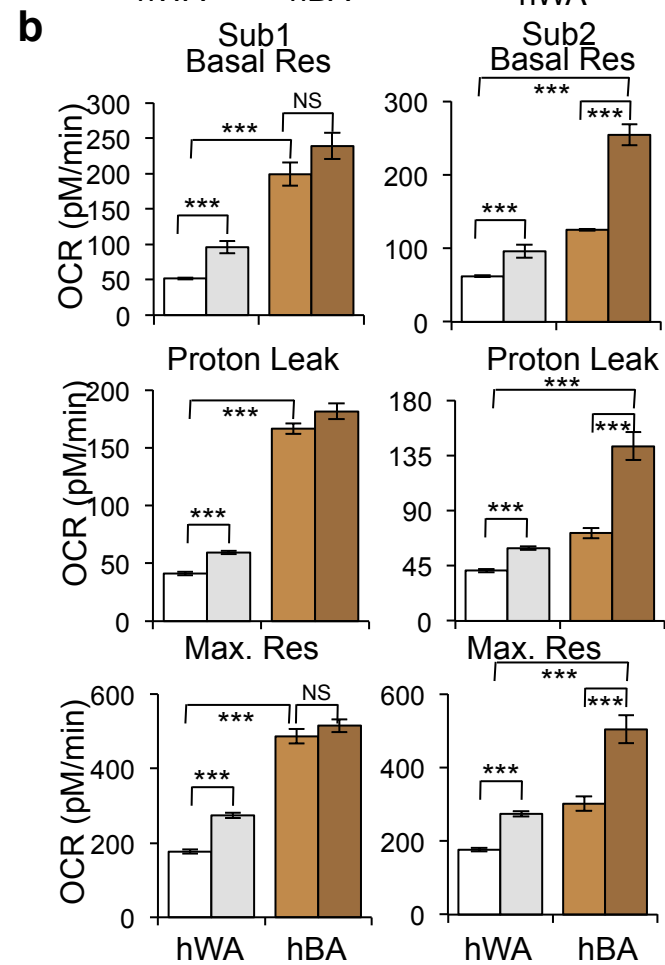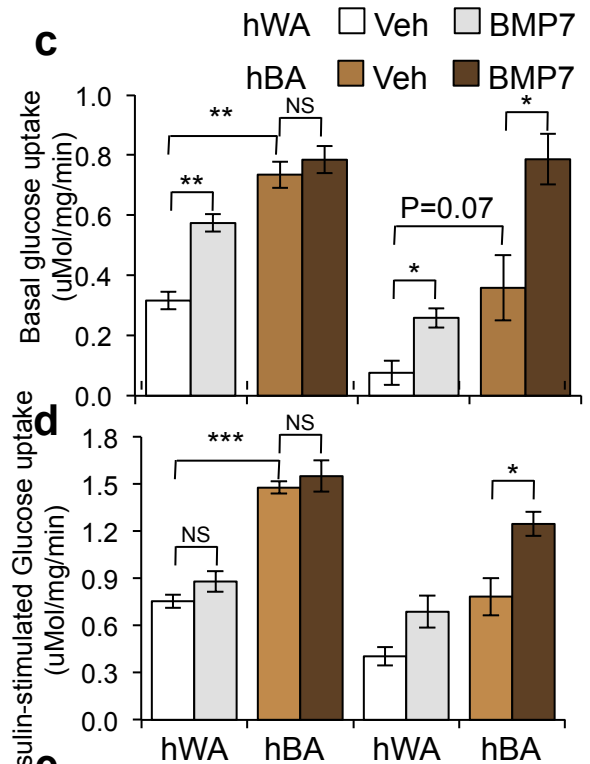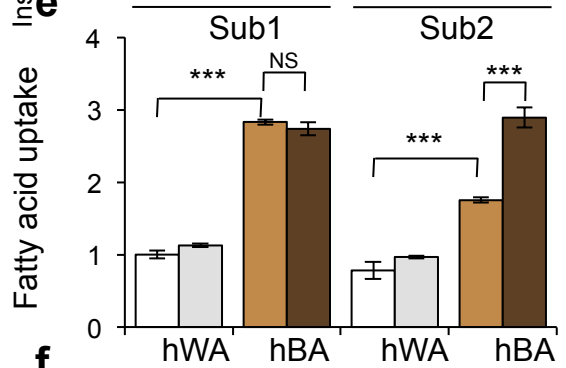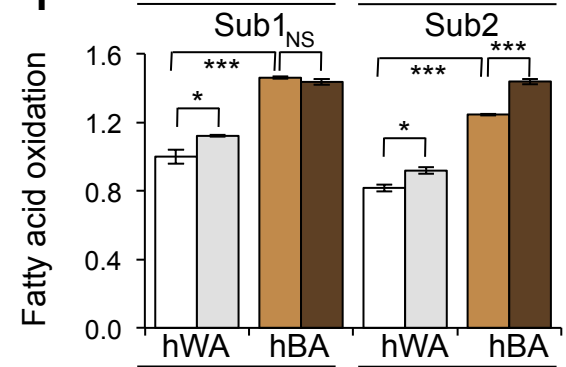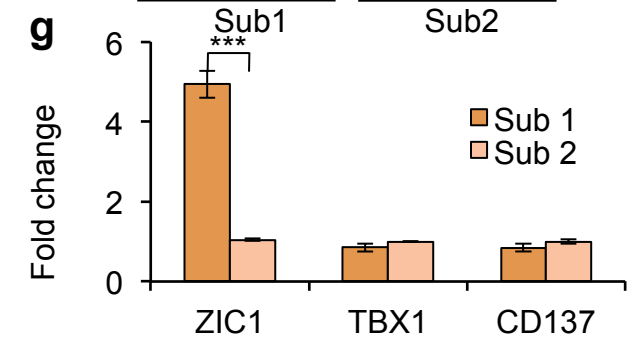

Supplementary Figure 5. Characterization of gene expression, oxygen consumption and fuel utilization in hWA and hBA with BMP7, BMP8, and FGF21 pretreatment and the expression of lineage markers in hBAT-SVF. (a) Q-RT-PCR analysis for *UCP1* and *PPARG* mRNA expression in differentiated hWA and hBA from Sub1 and Sub2 that were pre-treated with 3.3 nM BMP7, 3.3 nM BMP8 and 50 nM FGF21 for 6 days and then differentiation into mature adipocytes. Data are presented as a fold change compared to vehicle (Veh) treatment of hWA in each subject (mean  $\pm$  s.e.m.,  $n=3$ ). A representative experiment from a total of three independent studies is shown. (b) Oxygen consumption rate (OCR) was measured in the absence (Basal Res.) and presence of oligomycin (Proton Leak) or FCCP (Max. Res.) in hWA and hBA from Sub1 (Left) and Sub2 (Right) that were pre-treated with 3.3 nM BMP7 for 6 days and then differentiation into mature adipocytes.. Data are presented as mean  $\pm$  s.e.m. ( $n=10$ ; vehicle (Veh) vs BMP7).(c-d) Using 3H 2-Deoxy-Glucose for measurement of glucose uptake in differentiated hWA and hBA from Sub1 and Sub2 that were pre-treated with 3.3 nM BMP7 or vehicle (Veh) for 6 days and then differentiation into mature adipocytes. The cells were stimulated in the absence (shown on panel c) and presence (shown on panel d) of 100 nM insulin for 30 min before assay. The same number of cells was used in the assay and data was normalized to protein content. Data are presented as mean  $\pm$  s.e.m. ( $n=3$ ). A representative experiment from a total of three independent studies is shown. (e-f) Using <sup>14</sup>C-palmitic acid for determination of fatty acid uptake (shown on panel e) and oxidation (shown on panel f) in differentiated hWA and hBA from Sub1 and Sub2 that were pre-treated with 3.3 nM BMP7 or vehicle (Veh) for 6 days and then differentiation into mature adipocytes. Data are presented as a fold change compared to vehicle (Veh) treatment of Sub1 hWA (mean  $\pm$  s.e.m.,  $n=3$ ). A representative experiment from a total of two independent studies is shown. (g) Q-RT-PCR analysis for *ZIC1*, *TBX1*, and *CD137* expression in undifferentiated (Day 0) hBAT-SVF from 2 subjects. Data are presented as fold changes relative to subject 2 (mean  $\pm$  s.e.m.,  $n=3$ ). A representative experiment from a total of two independent studies is shown. Two-tailed Student's *t*-test was used to determine *P* values (\*  $P < 0.05$ , \*\*  $P < 0.01$ , \*\*\*  $P < 0.001$ ).

Xue et al., Suppl. Fig. 6

| Nile Red Staining   |                |                        |                                                                                      |
|---------------------|----------------|------------------------|--------------------------------------------------------------------------------------|
| Adipogenic Capacity | Nile Red Score | % of lipid laden cells | Microscope picture                                                                   |
| -                   | <0.2           | <20%                   | 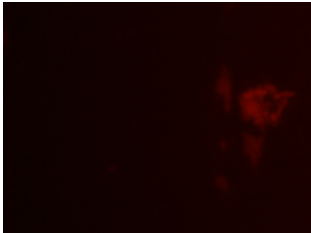  |
| +                   | 0.2-0.4        | 20-70%                 |   |
| ++                  | >0.4           | >70%                   |  |

Supplementary Figure 6. Determination of adipogenic capacity in differentiated clones by Nile red staining. Fluorescence intensity of Nile red staining was detected at Ex/Em=552/636nm, and was divided into different levels (adipogenic-: fluorescence intensity < 0.2; adipogenic+: fluorescence intensity 0.2-0.4; adipogenic++: fluorescence intensity > 0.4) after normalized to protein content. Representative microscope views of Nile red staining on day 18 were shown on right. Scale bar, 100  $\mu$ m.

Xue et al., Suppl. Fig. 7

|            |                  |                 | Luciferase Activity                                                                  |                                                                                       |
|------------|------------------|-----------------|--------------------------------------------------------------------------------------|---------------------------------------------------------------------------------------|
| UCP1 level | Luciferase Score | % of GFP+ cells | Microscope picture                                                                   |                                                                                       |
|            |                  |                 | GFP                                                                                  | Merge                                                                                 |
| Negative   | <10              | <5%             | 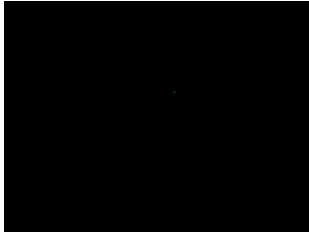   |    |
| Low        | 10-50            | 5-30%           |    |    |
| Medium     | 50-100           | 30-70%          |   |   |
| High       | >100             | >70%            |  |  |

Supplementary Figure 7. Definition of differential levels of UCP1 reporters in mature human adipocytes. Luciferase activity was measured and normalized to protein content, as indicated: negative < 10; low 10-50; medium 50-100; high > 100. And the indicated luciferase activity level is consistent with GFP expression in the same clone on day 18. The microscope views of GFP and merge with light picture are shown on right panel. Scale bar, 50  $\mu$ m.



## Positive correlation

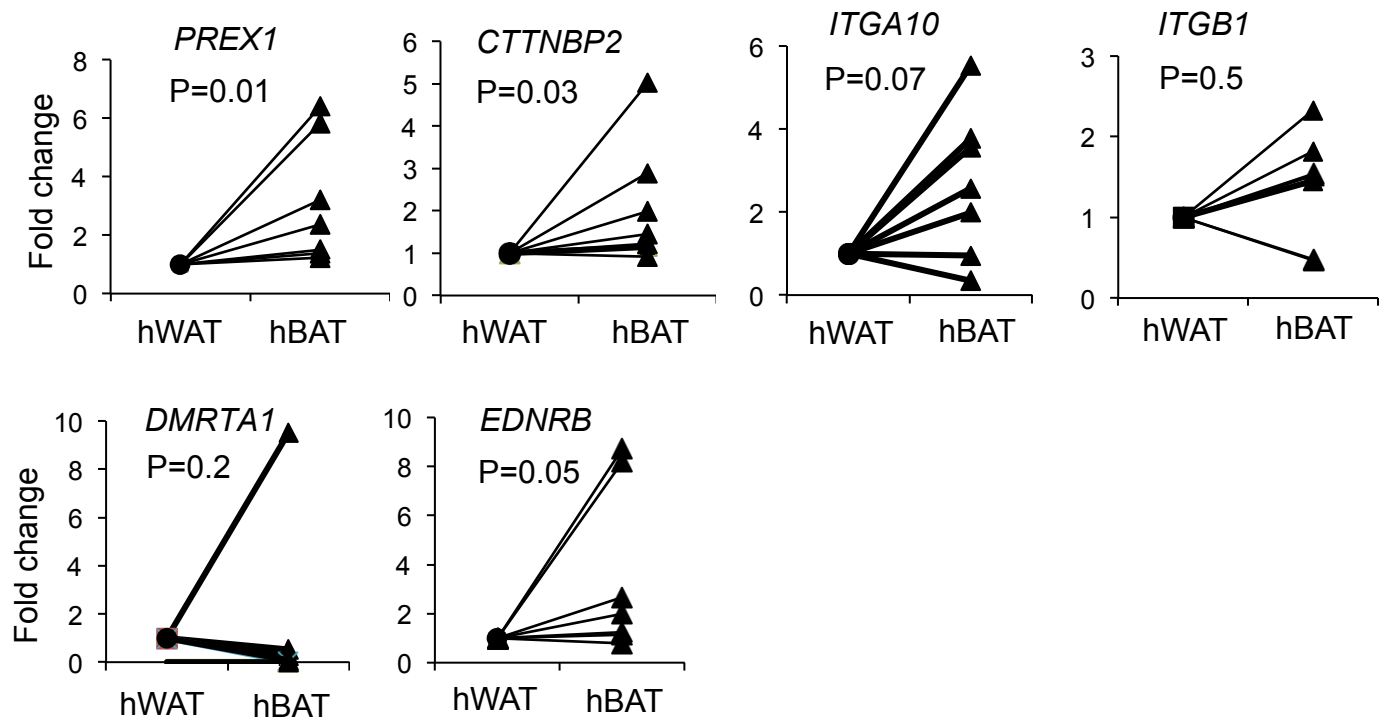

## Negative correlation

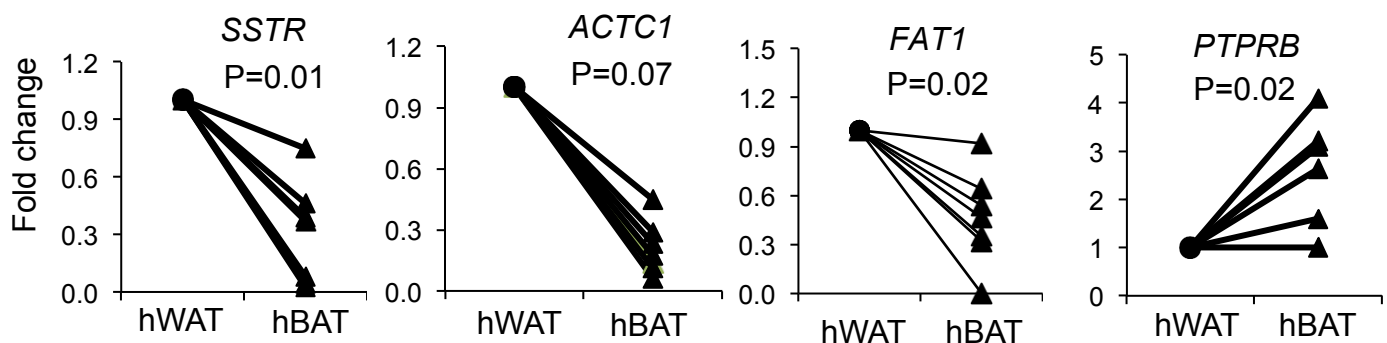

Supplementary Figure 8. Expression of positively and negatively correlated candidate genes in human neck fat derived from 7 subjects. Fat was resected from 7 patients undergone neck surgery. Q-RT-PCR analysis was performed for the expression of positive and negative correlation candidate genes that were normalized to 18s. The subcutaneous fat was used as control, white adipose tissues (hWAT), and the deeper fat from each patient that had the highest expression levels of *UCP1* was chosen for the human brown adipose tissues (hBAT) sample. *P* value was analyzed using Wilcoxon matched-pairs signed-ranks test.

Xue et al., Suppl. Fig. 9

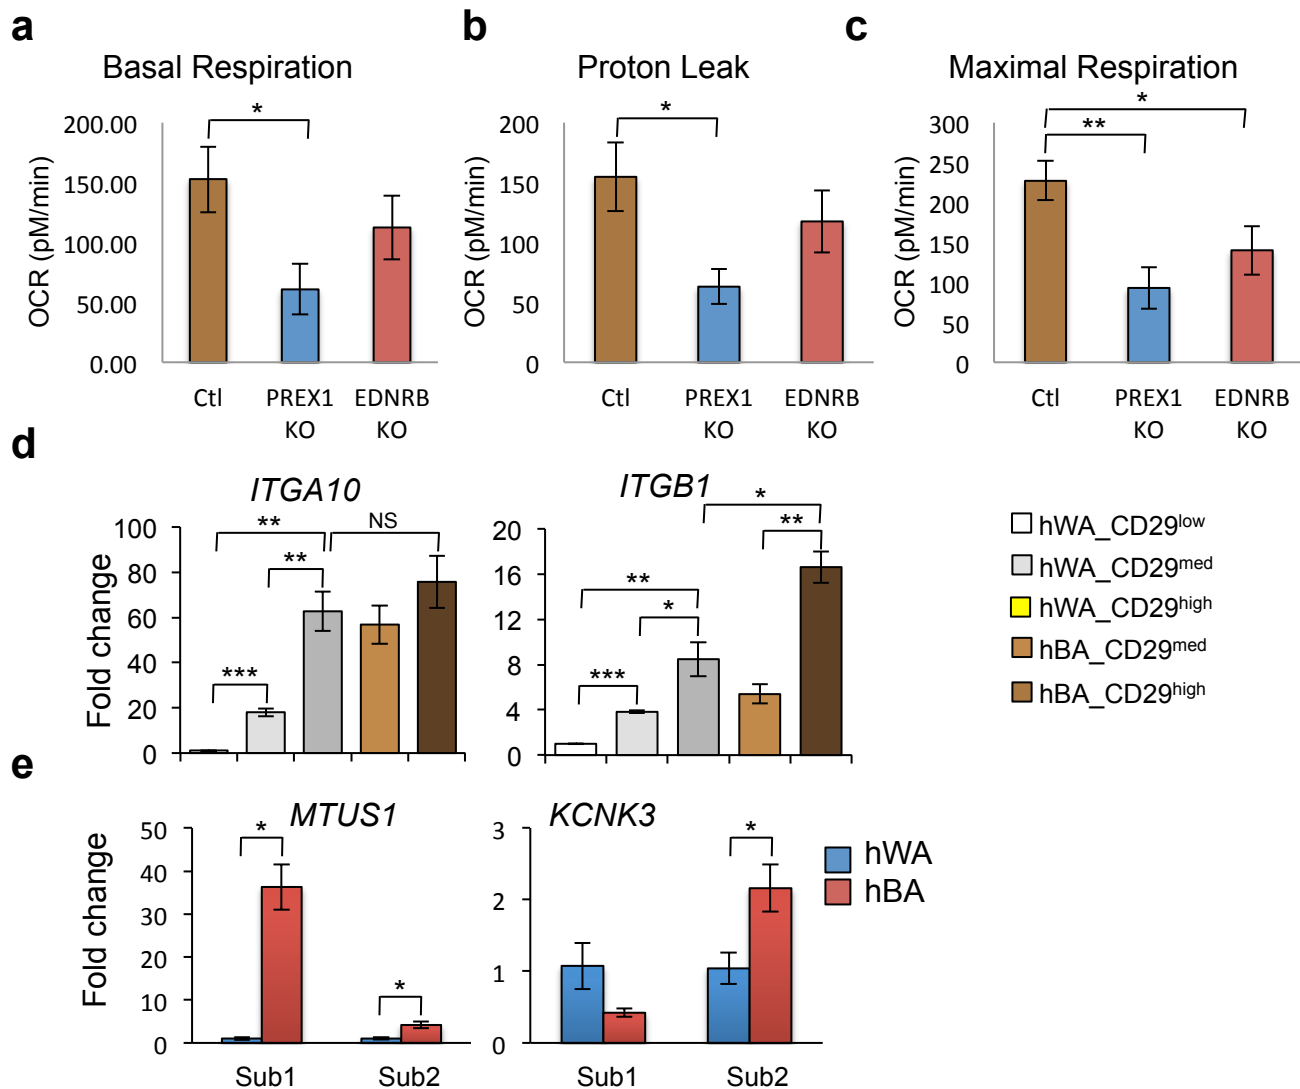

Supplementary Figure 9. Functional analysis of *PREX1* and *EDNRB* Knockout cells and expression of potential brown fat markers in hWA and hBA. Oxygen consumption rate (OCR) was measured using the Seahorse extracellular flux analyzer in wild type control, *PREX1* and *EDNRB* Knockout hBA. Equal numbers of progenitors were plated and differentiated. Quantifications of OCR in the (a) absence (Basal respiration, Basal Res.) and (b) presence of oligomycin (Proton Leak) or (c) FCCP (Maximal respiration, Max. Res.) are shown. Data were normalized to DNA content and are presented as mean  $\pm$  s.e.m. (n=7). Asterisks depict statistically significant differences between wild type and each knockout. A representative experiment from three independent studies is shown. (d) mRNA expression of *ITGA10* (Left) and *ITGB1* (Right) in sorted subpopulation with different expression level of CD29 on day 0. Data are shown as a fold change compared to CD29<sup>low</sup> subpopulation from hWAT-SVF (mean  $\pm$  s.e.m., n=3). (e) mRNA expression of *MTUS1* and *KCNK3* in the differentiated brown and white fat cells derived from pooled progenitors of Subject 1 and Subject 2. Two-tailed Student's *t*-test was used to determine *P* values (\* *P* < 0.05, \*\* *P* < 0.01, \*\*\* *P* < 0.001).

**Supplementary Table 1a. Clinical characteristics of subjects whose neck fat were used for generation of immortalized human WAT and BAT progenitors.**

| Patient Code | Age (year) | Sex | BMI (kg/m <sup>2</sup> ) | hWAT <sup>a</sup>               | hBAT <sup>a</sup>               |
|--------------|------------|-----|--------------------------|---------------------------------|---------------------------------|
| Subject 1    | 58         | M   | 28.0                     | SQ <sup>b</sup> SP <sup>c</sup> | CS <sup>d</sup> LC <sup>e</sup> |
| Subject 2    | 54         | M   | 25.1                     | SQ SP                           | CS PV <sup>f</sup>              |
| Subject 3    | 42         | M   | 33.0                     | SQ SP                           | CS PV                           |
| Subject 4    | 63         | M   | 33.3                     | SQ SP                           | CS LC PV                        |

<sup>a</sup>These two columns indicate the anatomical locations of neck fat tissues (as described in Ref. 20) used for generation of adipose progenitors.

<sup>b</sup>Subcutaneous <sup>c</sup>Subplatysmal <sup>d</sup>Carotid sheath <sup>e</sup>Longus colli <sup>f</sup>Prevertebral

**Supplementary Table 1b. Clinical characteristics of subjects whose neck fat were used for evaluating expression of candidate genes.**

| Patient Code | Age (year) | Sex | BMI (kg/m <sup>2</sup> ) |
|--------------|------------|-----|--------------------------|
| Subject 1    | 72         | M   | 30.9                     |
| Subject 2    | 46         | M   | 32.6                     |
| Subject 3    | 53         | M   | 28.0                     |
| Subject 4    | 33         | M   | 29.8                     |
| Subject 5    | 54         | F   | 36.3                     |
| Subject 6    | 44         | F   | 32.3                     |
| Subject 7    | 77         | F   | 20.4                     |

**Supplementary Table 2. Distribution of hWAT-SVF and hBAT-SVF clones that displayed different UCP1 levels and differential responses to BMP7 pre-treatment in 4 human subjects.**

**hWAT-SVF Clones (n=67)**

| Patient Code | Total N | UCP1(-) <sup>a</sup>      |                           | UCP1(+) <sup>b</sup> |
|--------------|---------|---------------------------|---------------------------|----------------------|
|              |         | BMP7 Resp(-) <sup>c</sup> | BMP7 Resp(+) <sup>d</sup> | BMP7 Resp(+)         |
| Subject1     | 32      | 32/32                     | 0/32                      | 0/32                 |
| Subject2     | 20      | 20/20                     | 0/20                      | 0/20                 |
| Subject3     | 12      | 11/12                     | 0/12                      | 1/12                 |
| Subject4     | 3       | 3/3                       | 0/3                       | 0/3                  |

**hBAT-SVF Clones (n=90)**

| Patient Code | Total N | UCP1(-)      | UCP1(+)        |                |
|--------------|---------|--------------|----------------|----------------|
|              |         | BMP7 Resp(-) | BMP7 Resp(-)   | BMP7 Resp(+)   |
| Subject1     | 41      | 2/41         | 29/41<br>(71%) | 10/41          |
| Subject2     | 15      | 0/15         | 5/15           | 10/15<br>(67%) |
| Subject3     | 15      | 3/15         | 3/15           | 9/15<br>(60%)  |
| Subject4     | 19      | 0/19         | 14/19<br>(74%) | 5/19           |

<sup>a</sup>UCP1 expression was considered negative in the differentiated clones, which was determined by luciferase activity on day 18. The luciferase activity score was less than 10 after normalized to protein amount.

<sup>b</sup>UCP1 expression was considered positive in the differentiated clones, which was determined by luciferase activity on day 18. The luciferase activity score was more than 10 after normalized to protein amount.

<sup>c</sup>Human fat progenitor clones were pre-treated with 3.3 nM BMP7 for 6 days and then differentiation into mature adipocytes. The fold change of luciferase activity between 0.8-1.5 compared to vehicle (Veh) treatment is defined as negative response to BMP7 stimulation (BMP7 Resp(-)).

<sup>d</sup>Human fat progenitor clones were pre-treated with 3.3 nM BMP7 for 6 days and then differentiation into mature adipocytes. The fold change of luciferase activity more than 1.5 compared to vehicle (Veh) treatment is defined as positive response to BMP7 stimulation (BMP7 Resp(+)).

**Supplementary.Table3. Correlation of expression of known adipose markers in human preadipocytes with UCP1-reporter levels in adipocytes**

| General preadipocyte marker |           |           |         |                                                    |
|-----------------------------|-----------|-----------|---------|----------------------------------------------------|
| Gene Name                   | #Cor. Coe | P-values  | FDR     | Reference                                          |
| ZNF423                      | 0.337     | 0.0312*   | 0.232   | Gupta et al., Cell Metab. 2012                     |
| PDGFRB                      | -0.285    | 0.0708    | 0.353   | Tang et al., Science 2008                          |
| WAT marker                  |           |           |         |                                                    |
| TRIP (ASC-1)                | -0.267    | 0.0921    | 0.402   | Ussar et al., Sci Transl Me.2014                   |
| HOXC8                       | -0.388    | 0.0123*   | 0.138   | Gesta et al., PNAS 2006; Timmons et al., PNAS 2007 |
| HOXC9                       | -0.61     | 0.000022* | 0.00309 | Gesta et al., PNAS 2006; Timmons et al., PNAS 2007 |
| Brown/Beige fat marker      |           |           |         |                                                    |
| PRDM16                      | 0.572     | 0.000093* | 0.00701 | Seale et al., Nature 2008                          |
| EBF2                        | 0.253     | 0.111     | 0.439   | Rajakumari et al., Cell Metab 2013                 |
| EBF3                        | 0.344     | 0.0277*   | 0.218   | Wu et al., Cell 2012                               |
| FBXO31                      | 0.37      | 0.0171*   | 0.167   | Wu et al., Cell 2012                               |
| KCNK3                       | -0.223    | 0.161     | 0.523   | Shinoda et al., Nat Med 2015                       |
| MTUS1                       | -0.344    | 0.0276    | 0.218   | Shinoda et al., Nat Med 2015                       |
| Beige fat marker            |           |           |         |                                                    |
| TBX15                       | -0.387    | 0.0124*   | 0.139   | Gesta et al., PNAS 2006; Timmons et al., PNAS 2007 |
| TMEM26                      | 0.206     | 0.196     | 0.569   | Wu et al., Cell 2012                               |

# Cor.Coe. = Correlation Coefficient (see methods)

'-' indicates negative correlation

'\*\*' indicates significance ( $P < 0.05$ )

**Xue et al., Suppl. Table 4**

**Supplementary.Table4.The correlation coefficients, P-values and FDR for top-ranking genes**

|                             | # Cor. Coe. | P-Value  | FDR      | Gene Symbol |
|-----------------------------|-------------|----------|----------|-------------|
| <b>Positive Correlation</b> | 0.691       | 5.71E-07 | 0.000421 | EDNRB       |
|                             | 0.696       | 4.39E-07 | 0.000376 | ST6GALNAC3  |
|                             | 0.695       | 4.7E-07  | 0.000387 | CTTNBP2     |
|                             | 0.794       | 5.88E-10 | 5.51E-06 | PREX1       |
|                             | 0.732       | 5.33E-08 | 0.000106 | S1PR3       |
|                             | 0.723       | 9.36E-08 | 0.000144 | SVIL        |
|                             | 0.727       | 7.25E-08 | 0.000128 | C17orf60    |
|                             | 0.72        | 1.13E-07 | 0.000156 | MASP1       |
|                             | 0.691       | 5.61E-07 | 0.00042  | PXK         |
|                             | 0.702       | 3.09E-07 | 0.000288 | C10orf90    |
|                             | 0.728       | 6.97E-08 | 0.000128 | TBC1D19     |
|                             | 0.732       | 5.39E-08 | 0.000106 | DNASE1L1    |
|                             | 0.713       | 1.7E-07  | 0.0002   | GPRC5A      |
|                             | 0.7         | 3.5E-07  | 0.00032  | ITGA10      |
|                             | 0.72        | 1.11E-07 | 0.000156 | ETFDH       |
|                             | 0.695       | 4.5E-07  | 0.000376 | MORN4       |
|                             | 0.72        | 1.14E-07 | 0.000156 | MRPS6       |
|                             | 0.802       | 2.82E-10 | 4.64E-06 | SETDB2      |
|                             | 0.73        | 6.2E-08  | 0.000118 | WRB         |
|                             | 0.692       | 5.47E-07 | 0.00042  | SYNRG       |
| 0.705                       | 2.64E-07    | 0.000269 | ANP32A   |             |
| 0.82                        | 5.62E-11    | 2.78E-06 | DMRTA1   |             |
| <b>Negative Correlation</b> | -0.721      | 1.05E-07 | 0.000156 | TEK         |
|                             | -0.764      | 6.15E-09 | 3.15E-05 | CDH13       |
|                             | -0.692      | 5.38E-07 | 0.00042  | EPB41L3     |
|                             | -0.69       | 6.02E-07 | 0.000437 | KRTCAP2     |
|                             | -0.705      | 2.72E-07 | 0.000269 | NUCB2       |
|                             | -0.711      | 1.93E-07 | 0.000222 | SMYD2       |
|                             | -0.755      | 1.15E-08 | 4.61E-05 | PSME4       |
|                             | -0.715      | 1.46E-07 | 0.000181 | TJP1        |
|                             | -0.741      | 2.98E-08 | 7.26E-05 | ZNF518B     |
|                             | -0.753      | 1.31E-08 | 4.61E-05 | GRIK2       |
|                             | -0.696      | 4.45E-07 | 0.000376 | ANTXR1      |
|                             | -0.706      | 2.59E-07 | 0.000269 | SLC7A6      |
|                             | -0.795      | 5.36E-10 | 5.51E-06 | FAT1        |
|                             | -0.692      | 5.51E-07 | 0.00042  | THBS1       |
|                             | -0.741      | 3.09E-08 | 7.26E-05 | TOM1L1      |
|                             | -0.747      | 1.98E-08 | 6.13E-05 | CSRP2       |
|                             | -0.81       | 1.48E-10 | 3.65E-06 | STXBP6      |
|                             | -0.702      | 3.09E-07 | 0.000288 | ACTC1       |
|                             | -0.708      | 2.22E-07 | 0.000246 | SHROOM3     |
|                             | -0.749      | 1.81E-08 | 5.98E-05 | WNT2        |
| -0.718                      | 1.24E-07    | 0.000166 | HAPLN1   |             |
| -0.737                      | 3.87E-08    | 8.31E-05 | COL12A1  |             |
| -0.746                      | 2.2E-08     | 6.39E-05 | NALCN    |             |
| -0.739                      | 3.44E-08    | 7.72E-05 | PLCXD3   |             |
| -0.776                      | 2.49E-09    | 1.54E-05 | PTPRB    |             |
| -0.744                      | 2.55E-08    | 6.64E-05 | SSTR1    |             |

# Cor. Coe. = Correlation Coefficient (see methods), '-' indicates negative correlation

**Supplementary.Table5. Quantitative Real-Time PCR primer sequences**

| Gene     |         | Sequence                  |
|----------|---------|---------------------------|
| 18s      | Forward | TCAACTTTTCGATGGTAGTCGCCGT |
|          | Reverse | TCCTTGGATGTGGTAGCCGTTTCT  |
| ACTC1    | Forward | TGTCTTCCCGTCCATCGT        |
|          | Reverse | TCTCTTGCTCTGGGCTTCAT      |
| CTTNBP2  | Forward | AGAGACCTTGTCATCGAGGC      |
|          | Reverse | CACCAGCACCTGCTTCATAG      |
| CD137    | Forward | AGCTGTTACAACATAGTAGCCAC   |
|          | Reverse | TCCTGCAATGATCTTGTCTCT     |
| DMRTA1   | Forward | GCAGAGACCGAGGCGTTAG       |
|          | Reverse | AACCTGCATCCCCGATGGTA      |
| DIO2     | Forward | AGTGCAGAAGGAGGTGACAACAGT  |
|          | Reverse | AAAGTCAAGAAGGTGGCATGTGGC  |
| EDNRB    | Forward | CAAGAACAAGTGCATGCGAA      |
|          | Reverse | ACATCTCAGCTCCAAATGGC      |
| FABP4    | Forward | ACTGGGCCAGGAATTTGACGAAGT  |
|          | Reverse | TCTCGTGGAAGTGACGCCTTTCAT  |
| FASN     | Forward | GCATCTGGACCCTCCTACCT      |
|          | Reverse | TCCTCAATTCCAATCCCTTG      |
| FAT1     | Forward | CCATTAGAGATGGCTCTGGC      |
|          | Reverse | TAGCCAATAATGGGAGGTCTG     |
| ITGA10   | Forward | GACAGAAACCGATCAGGCAT      |
|          | Reverse | AATAGGCGTGGGTGATGTTT      |
| ITGB1    | Forward | ATGGGACATTTGAGTGTGGC      |
|          | Reverse | TTTCCTGCAGTAAGCATCCA      |
| KCNK3    | Forward | CTACGAGCACTGGACCTTCTT     |
|          | Reverse | CGTAAGGATGTAGACGAAGCTGA   |
| LEP      | Forward | TCTATGTCCAAGCTGTGC        |
|          | Reverse | TTGGAGGAGACTGACTGC        |
| MTUS1    | Forward | ATCTCAAGGCAGCTTTCACG      |
|          | Reverse | TCGCTTGTTGACTTTCGACTC     |
| PPARGC1A | Forward | AGTGGTGCAAGTACCAATCA      |
|          | Reverse | CTGCTAGCAAGTTTGCCTCA      |
| PPARG    | Forward | ACTCTGGGAGATTCTCCTATT     |
|          | Reverse | CTCCATAGTCAAATCCAGAAG     |
| PREX1    | Forward | CTCAACGAGATCTTGGGCAC      |
|          | Reverse | GACCTTGACATTCTCCTCCG      |
| PTPRB    | Forward | GAACTGTGGTCTTGCAAACAG     |
|          | Reverse | AAGGAGTCCACCAAACATGC      |
| SSTR1    | Forward | GAAGTTGTCTGAGAGAAAGCCAT   |
|          | Reverse | CTGGTCAACGTGTTTGCTGAG     |
| TBX1     | Forward | ACGACAACGGCCACATTATTC     |
|          | Reverse | CCTCGGCATATTTCTCGCTATCT   |
| TMEM26   | Forward | ATGGAGGGACTGGTCTTCCTT     |
|          | Reverse | CTTCACCTCGGTCACTCGC       |
| ZIC1     | Forward | AAGATCCACAAAAGGACGCA      |
|          | Reverse | CACGTGCATGTGCTTCTTG       |
| UCP1     | Forward | ACCGCAGGGAAAGAAACAGC      |
|          | Reverse | TCAGATTGGGAGTAGTCCCT      |
